# Supplementary material
Source: PubMed Central journal article supplement (PMC4561595)
Supplement: NIHMS670660-supplement-01.pdf [file NIHMS670660-supplement-01.pdf]

**Supplementary Table:** Influence of current body mass index on the relationship between body size perception and temporal change in body size perception with prevalent heart disease in Golestan Cohort Study.

|                                                             | Men                      | Women                    |
|-------------------------------------------------------------|--------------------------|--------------------------|
|                                                             | Adjusted OR*<br>(95% CI) | Adjusted OR*<br>(95% CI) |
| <b>Pictogram at Age 15</b>                                  |                          |                          |
| 1 (slimmest)                                                | 1.22 (0.99 – 1.49)       | 1.04 (0.88 – 1.24)       |
| 2                                                           | 1.05 (0.89 – 1.23)       | 0.90 (0.74 – 1.08)       |
| 3                                                           | Reference                | Reference                |
| 4                                                           | 1.09 (0.92 – 1.30)       | 0.96 (0.77 – 1.20)       |
| 5                                                           | 1.13 (0.91 – 1.41)       | 1.20 (0.98 – 1.48)       |
| 6                                                           | 1.01 (0.73 – 1.38)       | 1.01 (0.80 – 1.27)       |
| 7                                                           | 1.21 (0.81 – 1.78)       | 0.96 (0.73 – 1.26)       |
| 8                                                           | -                        | 0.90 (0.66 – 1.21)       |
| 9                                                           | -                        | 0.95 (0.74 – 1.22)       |
| <b>Pictogram at Age 30</b>                                  |                          |                          |
| 1 (slimmest)                                                | 1.54 (0.98 – 2.43)       | 1.45 (1.16 – 1.81)       |
| 2                                                           | 1.06 (0.86 – 1.30)       | 1.07 (0.91 – 1.26)       |
| 3                                                           | Reference                | Reference                |
| 4                                                           | 0.99 (0.85 – 1.16)       | 1.07 (0.91 – 1.27)       |
| 5                                                           | 1.22 (1.02 – 1.44)       | 1.13 (0.96 – 1.34)       |
| 6                                                           | 1.11 (0.86 – 1.45)       | 1.27 (1.06 – 1.51)       |
| 7                                                           | 1.39 (0.88 – 2.17)       | 1.22 (0.97 – 1.52)       |
| 8                                                           | -                        | 1.17 (0.87 – 1.58)       |
| 9                                                           | -                        | 0.97 (0.64 – 1.48)       |
| <b>Pictogram at the Time of Interview</b>                   |                          |                          |
| 1 (slimmest)                                                | 1.17 (0.86 – 1.58)       | 1.06 (0.85 – 1.34)       |
| 2                                                           | 0.99 (0.80 – 1.23)       | 0.85 (0.69 – 1.05)       |
| 3                                                           | Reference                | Reference                |
| 4                                                           | 1.10 (0.92 – 1.32)       | 0.88 (0.73 – 1.05)       |
| 5                                                           | 0.99 (0.81 – 1.22)       | 0.91 (0.76 – 1.09)       |
| 6                                                           | 1.12 (0.87 – 1.44)       | 1.00 (0.82 – 1.21)       |
| 7                                                           | 1.27 (0.84 – 1.91)       | 0.96 (0.76 – 1.21)       |
| 8                                                           | -                        | 1.07 (0.79 – 1.45)       |
| 9                                                           | -                        | 1.09 (0.77 – 1.54)       |
| <b>Change in Pictogram from Age 15 to 30</b>                |                          |                          |
| Major decrease (>2)                                         | 1.29 (0.67 – 2.45)       | 1.23 (0.95 – 1.60)       |
| Slight decrease (≤2)                                        | 0.87 (0.69 – 1.09)       | 0.90 (0.75 – 1.08)       |
| No change                                                   | Reference                | Reference                |
| Slight increase (≤2)                                        | 1.21 (1.04 – 1.41)       | 0.99 (0.86 – 1.14)       |
| Major increase (>2)                                         | 1.13 (0.83 – 1.54)       | 1.23 (1.02 – 1.49)       |
| <b>Change in Pictogram from Age 30 to Time of Interview</b> |                          |                          |
| Major decrease (>2)                                         | 1.09 (1.10 – 2.02)       | 1.07 (0.88 – 1.30)       |
| Slight decrease (≤2)                                        | 0.89 (1.08 – 1.54)       | 0.96 (0.82 – 1.12)       |
| No change                                                   | Reference                | Reference                |
| Slight increase (≤2)                                        | 1.19 (1.06 – 1.47)       | 1.06 (0.91 – 1.25)       |
| Major increase (>2)                                         | 1.47 (0.98 – 1.94)       | 1.15 (0.92 – 1.43)       |

\* Adjusted for age, ethnicity, place of residence, education level, economic status, cigarette smoking, physical activity, hypertension, self-reported diabetes and current body mass index.
